# Supplementary material for: The role of ginseng derivatives against chemotherapy-induced cardiotoxicity: A systematic review of non-clinical studies
Source: Front Cardiovasc Med. 2023 Feb 9;10:1022360. doi: 10.3389/fcvm.2023.1022360 (PMC9946988; doi:10.3389/fcvm.2023.1022360)
Supplement: Supplementary file 1 [file Table_1.docx]

| Table: The search keywords of the present study | | | | |
| --- | --- | --- | --- | --- |
| Shinseng keywords | AND | Chemotherapy keywords | AND | Heart (toxicity) keywords |
| Ginsenosides OR Sanchinosides OR Panaxosides OR Ginsenoside OR Panax OR "ginseng saponin" OR ginsenine OR ginsenol OR panaxagin OR protopanaxatriol OR protopanaxadiol OR protopanaxa OR panaxoside OR gingilone OR ginsenoside OR "ren shen" OR shinseng OR Ninjin OR Ninjins OR Renshen OR Renshens OR Shinseng OR Shinsengs OR "Jen Shen" OR "Jen Shens" OR "Shen, Jen" OR Ginseng OR Ginsengs OR Schinseng OR Schinsengs OR "Korean Red Ginseng" OR "Ginseng, Korean Red" OR "Korean Red Ginsengs" OR "Korean Ginsengs" OR "Korean Ginseng" OR "Red Ginseng, Korean" OR "Ginseng, Korean" OR "Panax ginseng" | AND | Chemotherapy OR Adriamycin OR DoxorubicinOREloxatinORBleomycin OR4-demethoxydaunorubicinORIdarubicinOR4-demethoxydaunorubicinORCisplatinORCarboplatinORCyclophosphamideORCytophosphaneORParaplatinORDaunorubicinORDaunomycinOROxaliplatinORMethotrexateORAmethopterinORTaxotereOREtoposideORXeloda ORMitomycinORVinorelbineORCarmustineORMelphalan OR EtopophosORProcarbazineOREpirubicinORVinblastineORNavelbineORMethotrexateORAmethopterinORDocetaxelORVincristine ORMustineORFluorouracilORAdrucilOREmbikhinOROxaliplatinORCytosineORCapecitabine ORPaclitaxelORTaxolORMechlorethamineOREloxatinORCytarabineORIrinotecan | AND | Heart ORMyocytes ORCardiotoxicity ORCardiomyocyte ORCardiomyopathies ORMyocardial OR Cardiomyopathy OR Myocardium ORCardiopathy ORCardiotoxicity ORCardiopathic ORCardi* |
